# Supplementary material for: Implementing Psychiatric Advance Directives: The Transmitter and Receiver Problem and the Neglected Right to Be Deemed Incapable
Source: Atypon-hosted journal article supplement (doi:10.1176/appi.ps.202000659), 2020-12-18
Supplement: appi.ps.202000659.ds001.pdf [file appi.ps.202000659.ds001.pdf]

**Transmitter and Receiver Barriers to Implementing Psychiatric Advance Directives**

| <b>Description</b>                                                       | <b>Potential solutions</b>                                                              |
|--------------------------------------------------------------------------|-----------------------------------------------------------------------------------------|
| <b>Transmitter barriers</b>                                              |                                                                                         |
| Legal form complexity                                                    | Simplify legal forms                                                                    |
|                                                                          | Facilitate to aid completion                                                            |
|                                                                          | Develop computer-assisted forms                                                         |
|                                                                          | Other support materials                                                                 |
| Social isolation, lack of trust in potential proxies                     | Facilitate discussion with potential proxies                                            |
| Low health literacy                                                      | Accessible information materials & personal assistance                                  |
| Proxies not prepared to understand and support PAD                       | Aid proxies in understanding and performing role.                                       |
| Need for assistance in PAD drafting                                      | Develop network of facilitators                                                         |
|                                                                          | Identify advocacy group to sustain PAD facilitation                                     |
| Lack of general awareness and 'buy-in' about PADs among key stakeholders | Disseminate information about PADS through public information and advocacy stakeholders |
| Visibility of PADs in clinical records                                   | PAD on-line/accessible storage repositories                                             |
|                                                                          | Storage in electronic health records                                                    |
|                                                                          | Self-storage on USB drives                                                              |
|                                                                          | Card or bracelet alert                                                                  |
| <b>Receiver barriers</b>                                                 |                                                                                         |
| Low prevalence of PADs, providers not on 'look-out' for PADs             | Increase prevalence                                                                     |
|                                                                          | Generate PAD alerts in health records.                                                  |
| Lack of provider/health system awareness and implementation of PADs      | Disseminate information about PADS for providers and health systems                     |
|                                                                          | Emphasize compliance with CMS 'Conditions of Participation'                             |
|                                                                          | Technical assistance to health systems in developing                                    |

|                                                                       |                                                                                                          |
|-----------------------------------------------------------------------|----------------------------------------------------------------------------------------------------------|
|                                                                       | PAD policies and procedures                                                                              |
| Capacity determination under-emphasized in informed consent processes | Educate providers about critical importance of capacity determination and "Right to Be Deemed Incapable" |
